# Supplementary material
Source: MDPI journal article supplement (https://www.mdpi.com/search?q=insects-11-00509)
Supplement: s001 [file insects-11-00509-s001.pdf]

## Supplementary material

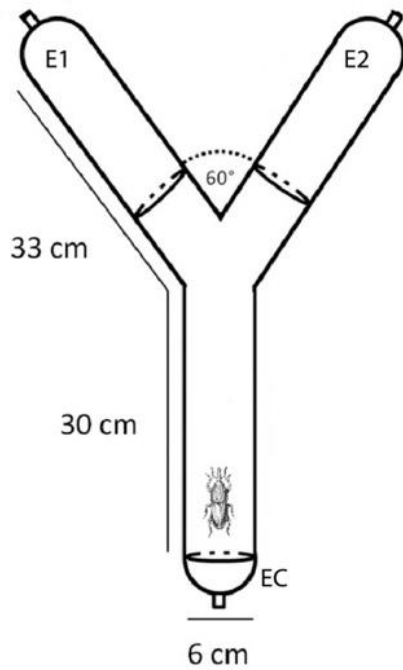

**Figure S1. Two-way olfactometer structure.** BW behaviour in the olfactometer: E1 represents individuals choosing one stimuli, E2 represents individuals choosing the other stimuli or absence of stimulus and EC indicate individuals not moving from the initial place.

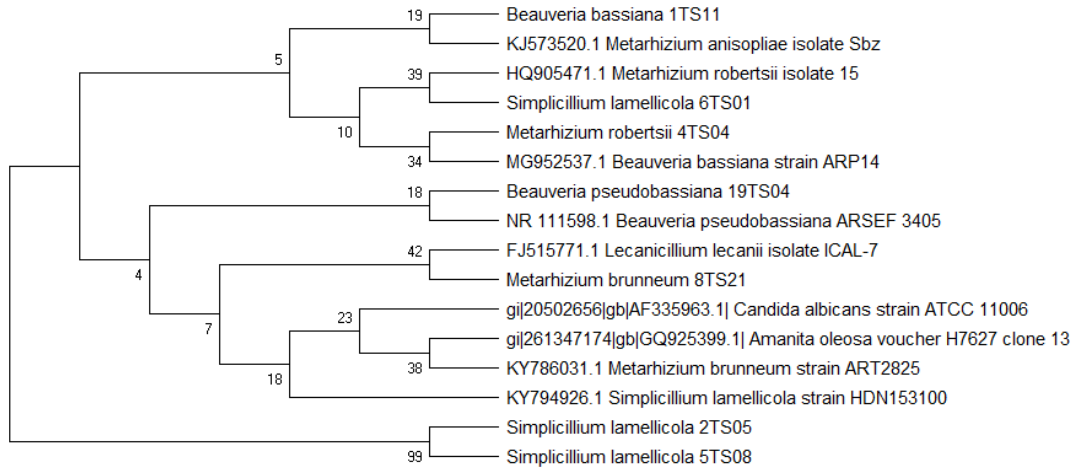

**Figure S2. Molecular Phylogenetic analysis of the ITS region by Maximum Likelihood method (Bootstrap consensus tree of 800 replicates), based on the Tamura-Nei model.** Branches corresponding to partitions reproduced in less than 50% bootstrap replicates are collapsed. The percentage of replicate trees in which the associated taxa clustered together in the bootstrap test are shown next to the branches [1]. Evolutionary analyses were conducted in MEGA X [2].

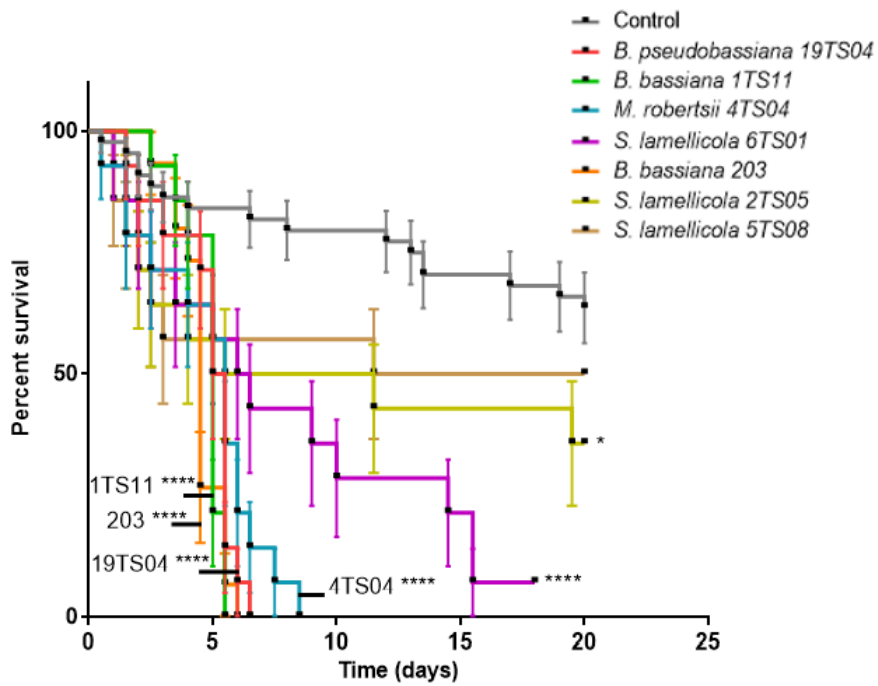

**Figure S3.** *B. pseudobassiana* 19TS04, *B. bassiana* 1TS11, *M. robertsii* 4TS04, *B. bassiana* 203 and *S. lamellicola* 6TS01 are significantly virulent on *G. mellonella* larvae at room humidity conditions. Asterisks indicate significant differences (\* $p < 0.05$ , \*\* $p < 0.01$ , \*\*\* $p < 0.001$  and \*\*\*\* $p < 0.0001$ ) respect to the control.

**Table S1. Soil collection from banana fields in the Canary Islands.** Abbreviations: Lat. = latitude, Long. = longitude, ASL = altitude, S = sprinkling, D = dripping, Cert. = certification, Int. = integrated production, ECO = ecological crop, Conv. = conventional crop.

| Code | Island       | SIGPAC            | Lat.        | Long.       | UTM                 | ASL | Irrigation | Cert.  |
|------|--------------|-------------------|-------------|-------------|---------------------|-----|------------|--------|
| GS01 | La Gomera    | 38/21/16/9006/2   | 28°10'24" N | 17°11'17" W | 28 R 285181 3118341 | 82  | S          | No     |
| GS02 | La Gomera    | 38/21/15/13/2     | 28°10'38" N | 17°11'00" W | 28 R 285652 3118764 | 32  | S          | No     |
| GS03 | La Gomera    | 38/21/15/167/1    | 28°10'07" N | 17°11'31" W | 28 R 284790 3117824 | 83  | S          | No     |
| PS01 | La Palma     | 38/14/21/64/1     | 28°30'06" N | 17°52'16" W | 28 R 218959 3156139 | 56  | S          | Int. P |
| PS02 | La Palma     | 38/7/6/306/1      | 28°49'49" N | 17°47'00" W | 28 R 228404 3192365 | 170 | S          | Conv.  |
| PS03 | La Palma     | 38/24/13/218/1    | 28°38'26" N | 17°55'09" W | 28 R 214628 3171650 | 267 | S          | ECO    |
| PS04 | La Palma     | 38/24/26/10/1     | 28°34'06" N | 17°53'36" W | 28 R 216961 3163582 | 69  | S          | Conv.  |
| PS05 | La Palma     | 38/24/26/82/1     | 28°33'40" N | 17°53'27" W | 28 R 217186 3162775 | 34  | S          | Conv.  |
| PS06 | La Palma     | 38/14/22/97/4     | 28°29'31" N | 17°52'20" W | 28 R 218824 3155063 | 10  | S          | Conv.  |
| PS07 | La Palma     | 38/30/7/156/1     | 28°44'58" N | 17°44'11" W | 28 R 232781 3183297 | 185 | S          | ECO    |
| PS08 | La Palma     | 38/24/13/56/1     | 28°38'31" N | 17°55'21" W | 28 R 214306 3171812 | 250 | S          | Conv.  |
| PS09 | La Palma     | 38/47/13/560/1    | 28°40'09" N | 17°56'08" W | 28 R 213103 3174861 | 360 | S          | Conv.  |
| PS10 | La Palma     | 38/30/13/252/1    | 28°46'44" N | 17°45'24" W | 28 R 230875 3186607 | 70  | S          | Conv.  |
| PS11 | La Palma     | 38/7/6/306/1      | 28°49'49" N | 17°46'58" W | 28 R 228459 3192364 | 160 | S          | Conv.  |
| PS12 | La Palma     | 38/14/10/36/2     | 28°29'08" N | 17°51'59" W | 28 R 219379 3154341 | 63  | S          | Conv.  |
| TS01 | Tenerife     | 38/26/3/48/ 1 a 6 | 28°24'23" N | 16°30'50" W | 28 R 351703 3143154 | 215 | D          | Int. P |
| TS02 | Tenerife     | 38/31/9/181/2     | 28°23'28" N | 16°34'18" W | 28 R 346021 3141533 | 230 | D          | No     |
| TS03 | Tenerife     | 38/42/1/32/1      | 28°22'23" N | 16°48'51" W | 28 R 322228 3139866 | 50  | D          | Int. P |
| TS04 | Tenerife     | 38/18/3/403/2 a 5 | 28°23'41" N | 16°40'12" W | 28 R 336391 3142063 | 115 | D          | Int. P |
| TS05 | Tenerife     | 38/28/5/9065/9    | 28°24'00" N | 16°33'34" W | 28 R 347231 3142503 | 150 | D          | Int. P |
| TS06 | Tenerife     | 38/10/5/17/3      | 28°21'53" N | 16°52'32" W | 28 R 316197 3139035 | 60  | D          | ECO    |
| TS07 | Tenerife     | 38/19/8/9000/136  | 28°10'48" N | 16°47'47" W | 28 R 323653 3118448 | 170 | D          | ECO    |
| TS08 | Tenerife     | 38/19/7/34/8      | 28°10'52" N | 16°48'02" W | 28 R 323245 3118577 | 135 | D          | Int. P |
| TS09 | Tenerife     | 38/1/1/82/1       | 28°08'54" N | 16°47'43" W | 28 R 323710 3114937 | 70  | D          | Int. P |
| TS10 | Tenerife     | 38/10/51/4        | 28°08'42" N | 16°47'16" W | 28 R 324441 3114557 | 80  | D          | Int. P |
| TS11 | Tenerife     | 38/6/4/214/6      | 28°01'56" N | 16°38'58" W | 28 R 337858 3101869 | 75  | D          | Int. P |
| TS12 | Tenerife     | 38/26/1/57/6      | 28°25'04" N | 16°30'43" W | 28 R 351910 3144413 | 100 | D          | Conv.  |
| TS13 | Tenerife     | 38/26/8/43/1      | 28°23'29" N | 16°32'30" W | 28 R 348961 3141526 | 91  | D          | Conv.  |
| TS14 | Tenerife     | 38/26/9/91/2      | 28°23'24" N | 16°33'04" W | 28 R 348033 3141384 | 252 | D          | Conv.  |
| TS15 | Tenerife     | 38/23/1/170/1     | 28°31'51" N | 16°23'47" W | 28 R 363375 3156803 | 75  | D          | Conv.  |
| TS16 | Tenerife     | 38/10/1/146/10    | 28°22'44" N | 16°50'20" W | 28 R 319815 3140550 | 95  | D          | Conv.  |
| TS17 | Tenerife     | 38/42/7/6/16      | 28°22'04" N | 16°48'13" W | 28 R 323254 3139266 | 72  | D          | ECO    |
| TS18 | Tenerife     | 38/23/2/44/3      | 28°31'38" N | 16°23'09" W | 28 R 364403 3156391 | 115 | D          | Conv.  |
| TS19 | Tenerife     | 38/26/1/29/1      | 28°24'36" N | 16°30'41" W | 28 R 351953 3143551 | 205 | D          | Conv.  |
| TS20 | Tenerife     | 38/26/2/13/1      | 28°24'38" N | 16°30'52" W | 28 R 351655 3143616 | 175 | D          | Conv.  |
| TS21 | Tenerife     | 38/19/5/233/1     | 28°11'36" N | 16°49'02" W | 28 R 321629 3119956 | 60  | D          | Int. P |
| TS22 | Tenerife     | 38/26/3/50/2      | 28°24'37" N | 16°31'02" W | 28 R 351382 3143589 | 170 | D          | Int. P |
| TS23 | Tenerife     | 38/19/2/939/1     | 28°12'51" N | 16°49'57" W | 28 R 320164 3122287 | 30  | D          | Int. P |
| CS01 | Gran Canaria | 35/09/2/111       | 28°09'28" N | 15°39'01" W | 28 R 436156 3114851 | 75  | D          | Conv.  |

---

|             |              |              |             |             |                     |     |   |       |
|-------------|--------------|--------------|-------------|-------------|---------------------|-----|---|-------|
| <b>CS02</b> | Gran Canaria | 35/6/6/1/1   | 28°08'05" N | 15°31'36" W | 28 R 448281 3112238 | 145 | D | Conv. |
| <b>CS03</b> | Gran Canaria | 35/9/2/103/2 | 28°09'27" N | 15°39'11" W | 28 R 435883 3114822 | 50  | D | Conv. |
| <b>CS04</b> | Gran Canaria | 35/6/6/10/1  | 28°08'01" N | 15°31'14" W | 28 R 448881 3112113 | 180 | D | Conv. |
| <b>CS05</b> | Gran Canaria | 35/6/8/272/1 | 28°08'24" N | 15°31'03" W | 28 R 449184 3112819 | 135 | D | Conv. |
| <b>CS06</b> | Gran Canaria | 35/6/8/455/3 | 28°08'10" N | 15°31'23" W | 28 R 448636 3112391 | 135 | D | Conv. |
| <b>CS07</b> | Gran Canaria | 35/9/1/244/1 | 28°09'11" N | 15°39'58" W | 28 R 434598 3114337 | 17  | D | Conv. |
| <b>CS08</b> | Gran Canaria | 35/6/7/312/1 | 28°08'14" N | 15°31'36" W | 28 R 448282 3112515 | 135 | D | Conv. |
| <b>CS09</b> | Gran Canaria | 35/9/1/260/4 | 28°08'49" N | 15°40'07" W | 28 R 434349 3113661 | 32  | D | Conv. |
| <b>CS10</b> | Gran Canaria | 35/9/1/288/1 | 28°09'03" N | 15°39'52" W | 28 R 434761 3114090 | 40  | D | Conv. |

---

Table S2. Fungal volatile organic compounds selected for the olfactometry bioassays.

| Num. | Compound             | Ret. Time (min) | Peak Height 10d | Peak Height 20d | Peak Height 30d | Peak Height 40d | Peak Height 50d | Peak Height 60d | Fungal species     |
|------|----------------------|-----------------|-----------------|-----------------|-----------------|-----------------|-----------------|-----------------|--------------------|
| C1   | Styrene              | 18,55           | -               | -               | -               | -               | -               | -               | Bb1TS11<br>Bb203   |
| C2   | Benzothiazole        | 31,00           | NA              | NA              | 23152           | NA              | NA              | NA              | Bb1TS11<br>(Bb203) |
| C3   | Camphor              | 29,11           | -               | -               | -               | -               | -               | -               | Bb1TS11            |
| C4   | Borneol              | 29,30           | 96273           | 24965           | NA              | 31486           | 20551           | NA              | Bb1TS11            |
| C4   | Borneol              | 29,30           | 52467           | 48687           | 39535           | 39445           | 66449           | 40861           | Bb203              |
| C5   | 1,3-dimethoxybenzene | 28,75           | 263989          | NA              | NA              | NA              | NA              | NA              | Ma4TS04            |
| C5   | 1,3-dimethoxybenzene | 28,75           | 7233098         | 509769          | 3583189         | 3807170         | 3046943         | 308330          | Pc123              |
| C6   | 1-octen-3-ol         | 22,36           | 26983           | 385375          | 141833          | 28896           | NA              | NA              | Ma4TS04            |
| C6   | 1-octen-3-ol         | 22,36           | 123365          | 108363          | 557934          | NA              | NA              | 308377          | Pc123              |
| C7   | 3-cyclohepten-1-one  | 15,20           | 50086           | 475717          | 306136          | 120587          | NA              | 233415          | Bb1TS11            |
| C7   | 3-cyclohepten-1-one  | 15,20           | 274698          | 246124          | 103529          | NA              | NA              | NA              | Ma4TS04            |
| C7   | 3-cyclohepten-1-one  | 15,20           | 714704          | 1027453         | NA              | NA              | NA              | NA              | Pc123              |
| C7   | 3-cyclohepten-1-one  | 15,20           | 179843          | 704724          | 147859          | 330871          | 239657          | 263098          | Bb203              |

**Table S3. Volatile organic compounds produced by the fungi analysed, in all the times measured.** The list is made with a selection of compounds with a match percentage on the databases of at least 50%, without limitations in abundance.

| <b>Compound number</b> | <b>Compound name</b>             | <b>Retention time (min)</b> | <b>Fungi</b>                   |
|------------------------|----------------------------------|-----------------------------|--------------------------------|
| 1                      | 2-butanone                       | 6,95                        | Pc123                          |
| 2                      | Methyl ethyl, 2-butanone         | 6,99                        | Pc123                          |
| 3                      | 3-methylbutanal                  | 9,10                        | Pc123                          |
| 4                      | 2-methylbutanal                  | 9,43                        | Pc123                          |
| 5                      | Dimethyldisulfide                | 12,60                       | Pc123                          |
| 6                      | 3-hydroxy-2-butanone             | 12,76                       | Pc123                          |
| 7                      | 4-methyl-2-pentanone             | 13,04                       | Pc123                          |
| 8                      | 3-methyl-1-butanol               | 13,28                       | Ma4TS04                        |
| 9                      | 2-chloro-octane                  | 13,45                       | Ma4TS04                        |
| 10                     | 3-methyl-2-pentanone             | 13,46                       | Pc123                          |
| 11                     | Cis-1-butyl-2-methylcyclopropane | 13,49                       | Bb1TS11                        |
| 12                     | 1-octene                         | 13,50                       | Bb203; Bb1TS11                 |
| 13                     | 1,3-octadiene                    | 15,20                       | Ma4TS04; Bb1TS11               |
| 14                     | 3-cyclohepten-1-one              | 15,20                       | Ma4TS04; Pc123; Bb203; Bb1TS11 |
| 15                     | Methyl-1,4-dioxide-pyrazine      | 15,24                       | Bb1TS11                        |
| 16                     | (1-methylethenyl) cyclopropene   | 15,31                       | Pc123                          |
| 17                     | 3-hydroxy-2-pentanone            | 16,41                       | Pc123                          |
| 18                     | Diethylamine-D1                  | 16,41                       | Pc123                          |
| 19                     | 2,4-octadiene                    | 16,64                       | Pc123; Bb203                   |
| 20                     | 4-methyl-3-hexanone              | 16,90                       | Pc123                          |
| 21                     | Nonane                           | 17,17                       | Pc123                          |
| 22                     | 3-methyl-3-penten-2-one          | 17,18                       | Pc123                          |
| 23                     | 5-methyl-2-hexanone              | 17,83                       | Pc123                          |
| 24                     | $\alpha$ -pinene                 | 19,40                       | Pc123; Bb203                   |
| 25                     | 2-butoxy-ethanol                 | 19,79                       | Pc123                          |
| 26                     | Anisole                          | 19,80                       | Pc123                          |
| 27                     | Methoxybenzene                   | 19,82                       | Pc123                          |
| 28                     | Propionoin                       | 20,01                       | Pc123                          |
| 29                     | 2,4-dimethyl-3-hexene            | 20,54                       | Pc123                          |
| 30                     | 3,4-dimethyl-2-hexene            | 20,55                       | Pc123                          |
| 31                     | Trans-3,4-dimethyl-2-hexene      | 20,55                       | Pc123                          |
| 32                     | 3,5-dimethyl-2-propylthiophene   | 20,61                       | Ma4TS04                        |
| 33                     | $\beta$ -pinene                  | 21,20                       | Pc123; Bb203                   |
| 34                     | 1- $\beta$ -pinene               | 21,24                       | Ma4TS04                        |

|    |                                                            |             |                                   |
|----|------------------------------------------------------------|-------------|-----------------------------------|
| 35 | 2,2,4,6,6-pentamethyl-heptane                              | 21,31       | Bb1TS11                           |
| 36 | 2-isopropyl-5-oxohexanal                                   | 21,42       | Pc123                             |
| 37 | 6-methyl-2-heptanone                                       | 21,42-25,13 | Pc123                             |
| 38 | Propyl-cyclohexane                                         | 21,69       | Pc123                             |
| 39 | Dimethyl-trisulfide                                        | 21,79       | Pc123                             |
| 40 | (2R*,6R*,8AS*)-6-hydroxyedulan                             | 22,01       | Bb203                             |
| 41 | 2-methyl-propanamide                                       | 22,14       | Pc123                             |
| 42 | 1-octen-3-ol                                               | 22,36       | Ma4TS04; Pc123                    |
| 43 | 3-octanone                                                 | 22,40       | Pc123; Bb203                      |
| 44 | 3-methoxy-benzenamine                                      | 22,56       | Ma4TS04                           |
| 45 | Trimethyl-pyrazine                                         | 22,70       | Pc123                             |
| 46 | 2-methyl-2-bornene                                         | 22,71       | Pc123; Bb203; Bb1TS11             |
| 47 | 2,4-dimethyl-methyl ester-hexanoic acid                    | 22,95       | Pc123                             |
| 48 | 6-methyl-bicyclo[3.3.0]oct-2-en-7-one                      | 23,04       | Bb203                             |
| 49 | 1-methyl-4-(1-methylethyl)-benzene                         | 23,18       | Ma4TS04; Pc123                    |
| 50 | Isocyano-benzene                                           | 23,58       | Pc123                             |
| 51 | 2-(2-ethoxyethoxy)-ethanol                                 | 23,60       | Ma4TS04; Pc123;<br>Bb203; Bb1TS11 |
| 52 | 2,2,4,4,6,8,8-heptamethyl-nonane                           | 24,26       | Bb1TS11                           |
| 53 | 2,4-dimethylfuran                                          | 24,41       | Pc123                             |
| 54 | 1,1'-oxybis-heptane                                        | 24,77       | Bb203                             |
| 55 | 2-dodecanone                                               | 24,9-34,28  | Pc123                             |
| 56 | 2-methyl-2-(2-methyl-2-butenyl)-furan                      | 25,47       | Pc123                             |
| 57 | Benzenemethanol                                            | 25,49       | Pc123                             |
| 58 | (2-methyl-1-propenyl)-benzene                              | 25,57       | Ma4TS04                           |
| 59 | 1-methyl-1H-1,2,4-triazole                                 | 25,58       | Bb1TS11                           |
| 60 | 2,3,3-trimethyl-1-butene                                   | 25,58       | Bb203                             |
| 61 | 2,2-dimethyl-propanal                                      | 25,63       | Ma4TS04                           |
| 62 | 2-methyl-3,4-dihydro-2H-pyran                              | 25,70       | Bb1TS11                           |
| 63 | 6-methyl-4 5-dihydro.alpha.[2H]-pyran                      | 25,70       | Pc123                             |
| 64 | 6,7-dimethoxy-2,2-dimethyl-2H-1-benzopyran                 | 26,41       | Pc123                             |
| 65 | 2-amino-3,5-dibromo-6-methylpyridine                       | 26,49       | Ma4TS04                           |
| 66 | 3-hydroxymandelic acid ethyl ester di-TMS                  | 26,49       | Pc123                             |
| 67 | 4-hydroxymandelic acid ethyl ester di-TMS                  | 26,49       | Ma4TS04; Pc123;<br>Bb203          |
| 68 | 4-trimethylsilyl-9,9-dimethyl-9-silafluorene               | 26,49       | Pc123                             |
| 69 | p-Trimethylsilyloxyphenyl-<br>bis(trimethylsilyloxy)ethane | 26,50       | Bb203                             |
| 70 | 1-methylallyl(cyclooctatetraene)titanium                   | 27,22       | Pc123; Bb1TS11                    |
| 71 | 4-octen-3-ol                                               | 27,55       | Ma4TS04                           |
| 72 | 4-fluoro-1,2-xylene                                        | 27,90       | Ma4TS04; Bb203                    |
| 73 | 1-phenyl-2-propanone                                       | 28,22       | Pc123                             |



|    |                                                                                    |             |                  |
|----|------------------------------------------------------------------------------------|-------------|------------------|
| 74 | 1,3-dimethoxy-benzene                                                              | 28,75       | Ma4TS04; Pc123   |
| 75 | 2-amino-4-methylpyrimidine                                                         | 29,14       | Pc123            |
| 76 | Bicyclo[2.2.1]heptane-2-carboxylic acid                                            | 29,14       | Pc123            |
| 77 | Borneol                                                                            | 29,30       | Bb203; Bb1TS11   |
| 78 | 9H-pyrrolo[3',4':3,4]pyrrolo[2,1-a] phthalazine-9,11(10H)-dione,10-ethyl-8-phenyl  | 30,54       | Ma4TS04          |
| 79 | 1-(2-furanyl)-3-butene-1,2-diol                                                    | 30,96       | Ma4TS04          |
| 80 | 2,4-bis(1,1-dimethylethyl)-phenol                                                  | 31,00       | Ma4TS04; Pc123   |
| 81 | Benzothiazole                                                                      | 31,00       | Bb1TS11          |
| 82 | 2-undecanone                                                                       | 31,15-32,18 | Pc123            |
| 83 | 16-oxosalutaridine                                                                 | 31,48       | Pc123            |
| 84 | 5-oxoisoboldine                                                                    | 31,48       | Ma4TS04          |
| 85 | 4,4-dimethyl-6-benzylamino-dihydro-8H-thiopyrano[4',3':4,5]thieno[2,3-d]pyrimidine | 31,50       | Ma4TS04; Pc123   |
| 86 | 2-octanone                                                                         | 32,19       | Pc123            |
| 87 | 1-ethyl-2-methyl-cyclohexane                                                       | 33,21       | Pc123            |
| 88 | 5-ethyl-3-hydroxy-4-methyl-2(5H)-furanone                                          | 33,21       | Bb1TS11          |
| 89 | 5-acetyl-2-hydrazino-4-methylpyridine                                              | 33,70       | Pc123            |
| 90 | $\beta$ -elemene                                                                   | 34,61       | Pc123            |
| 91 | 2-methoxy-3,8-dioxocephalotax-1-ene                                                | 34,86       | Pc123            |
| 92 | Di-amylcyclohexanol                                                                | 34,97       | Pc123            |
| 93 | Cyclotetradecane                                                                   | 36,68       | Pc123            |
| 94 | (+)-gymnomitrene                                                                   | 37,10       | Ma4TS04; Bb1TS11 |
| 95 | 1,4-bis(methylene)-cyclohexane                                                     | 37,10       | Ma4TS04          |
| 96 | 2-tridecanone                                                                      | 37,60       | Pc123            |
| 97 | trans- $\beta$ -farnesene                                                          | 37,94       | Pc123            |

## References

1. Tamura K. and Nei M. (1993). Estimation of the number of nucleotide substitutions in the control region of mitochondrial DNA in humans and chimpanzees. *Molecular Biology and Evolution* 10:512-526.
2. Kumar S., Stecher G., Li M., Knyaz C., and Tamura K. (2018). MEGA X: Molecular Evolutionary Genetics Analysis across computing platforms. *Molecular Biology and Evolution* 35:1547-1549.
